# Supplementary material for: Functionalized covalent organic framework aerogels for highly efficient removal of anionic and cationic dyes
Source: Royal Society of Chemistry journal article supplement (doi:10.1039/d3nj05030k), 2024-01-01
Supplement: d3nj05030k1.pdf [file d3nj05030k1.pdf]

## **Supporting Information**

### **Functionalized covalent organic frameworks aerogel for highly efficient removal of anionic and cationic dyes**

Xiaodi Chen, Chang Du, Zilu Pan, Hongping Wu, Changqun Cai, Chunyan Chen\*,

Guanqun Zhong\*

Key Laboratory for Green Organic Synthesis and Application of Hunan Province, Key  
Laboratory of Environmentally Friendly Chemistry and Application of Ministry of  
Education, College of Chemistry, Xiangtan University, Xiangtan 411105, China

### **Table of Contents**

#### **I. Preparation of Materials**

#### **II. Supporting figures**

#### **III. Supporting tables**

## I. Preparation of Materials.

### Synthesis of mono-(6-amino-6-deoxy)- $\beta$ -cyclodextrin(6-NH<sub>2</sub>-CD):

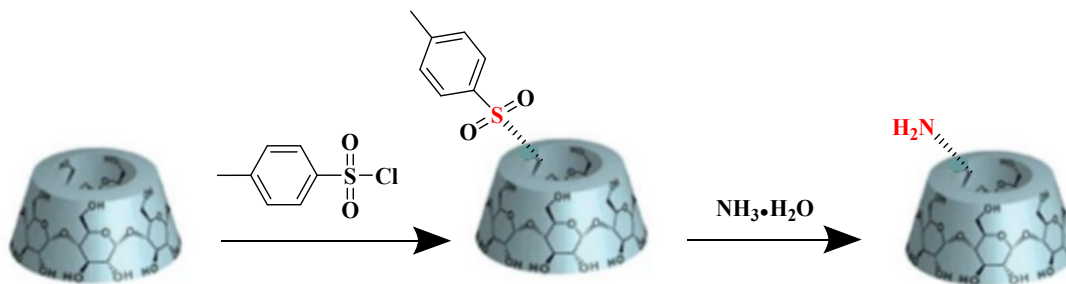

Figure S1 Synthesis of mono-(6-amino-6-deoxy)- $\beta$ -cyclodextrin(6-NH<sub>2</sub>-CD)

As shown in the image above, mono-6-oxo-p-toluenesulfonyl- $\beta$ -cyclodextrin(6-CD-OTS) is synthesized first. The product was prepared according to a modified literature synthesis<sup>1</sup>. 6 g (5.28 mmol) of  $\beta$ -cyclodextrin was dispersed in 50 mL of water, stirred vigorously and cooled to below 5 °C in an ice-water bath, then 2 mL of NaOH solution (8.2 M) was added dropwise with a syringe over 4 min. A clear solution was obtained. Next, 874 mg (5 mmol) p-toluenesulfonyl chloride was dissolved in 2 mL CH<sub>3</sub>CN and added dropwise to the solution via syringe over 6 min, the reaction mixture was stirred at room temperature for 3 h, and the precipitate was removed by vacuum filtration. The obtained solution was adjusted to pH=7 with 3 M HCl and frozen at 4°C overnight. The precipitate was separated by suction filtration, dissolved in hot water and recrystallized at 4°C for purification. The precipitation was collected by suction filtration. The product was obtained by vacuum drying at 50°C. Yield: 14%

6-NH<sub>2</sub>- $\beta$ -CD(6-NH<sub>2</sub>-CD) was prepared as described by Guo et al<sup>2</sup>. 0.64 g 6-OTs- $\beta$ -CD of powdered was dissolved in 30 mL of ammonia water and stirring at 75 °C for 4 h. After the solution was cooled to room temperature, an appropriate amount of acetone was added to the solution, a large amount of white precipitate was immediately precipitated,

then the white precipitate was recovered by suction filtration. The white sediment was dissolved in mixed solution of H<sub>2</sub>O/CH<sub>3</sub>OH (v/v=3:1) and precipitated by acetone. This operation was repeated several times to remove the unreacted 6-OTs-β-CD and ammonia. The white precipitate was recovered by suction filtration and dried at 50 °C in vacuum for 24 h. Yield: 17%

## II. Supporting figures

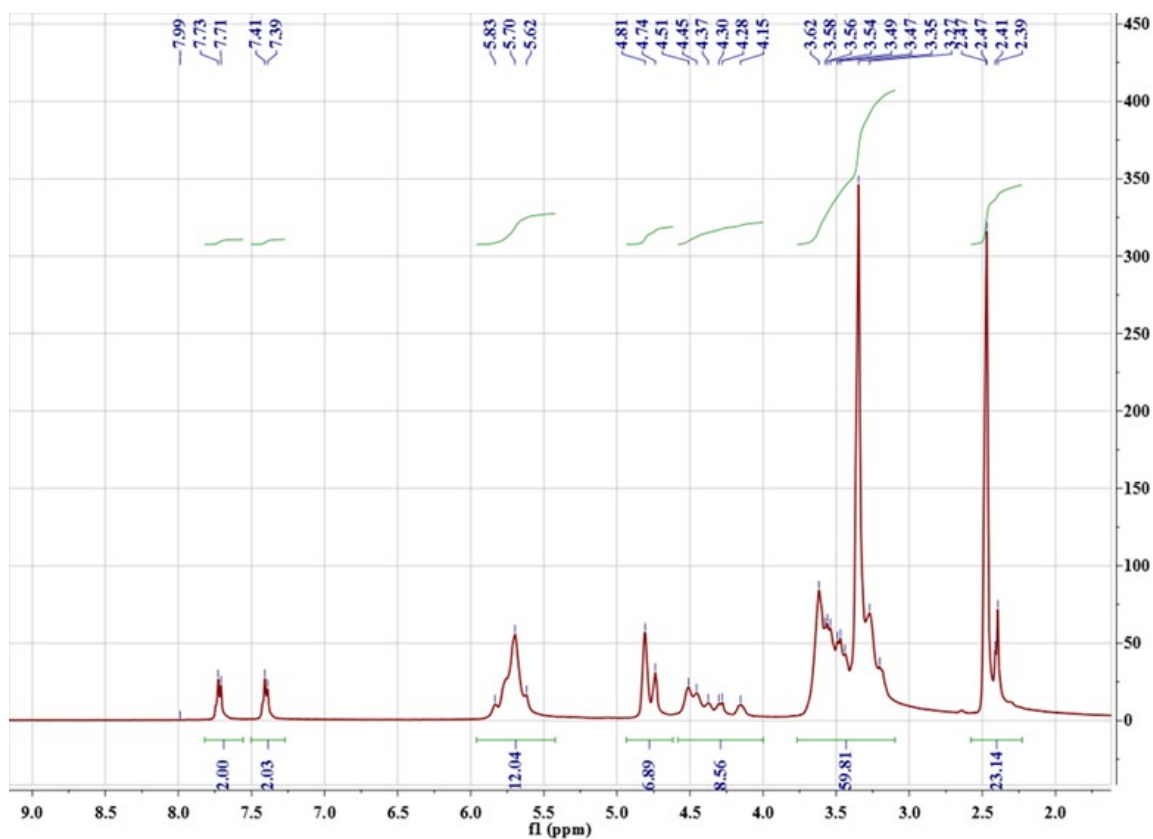

FigureS2 <sup>1</sup>H NMR of mono-6-oxo-p-toluenesulfonyl-β-cyclodextrin

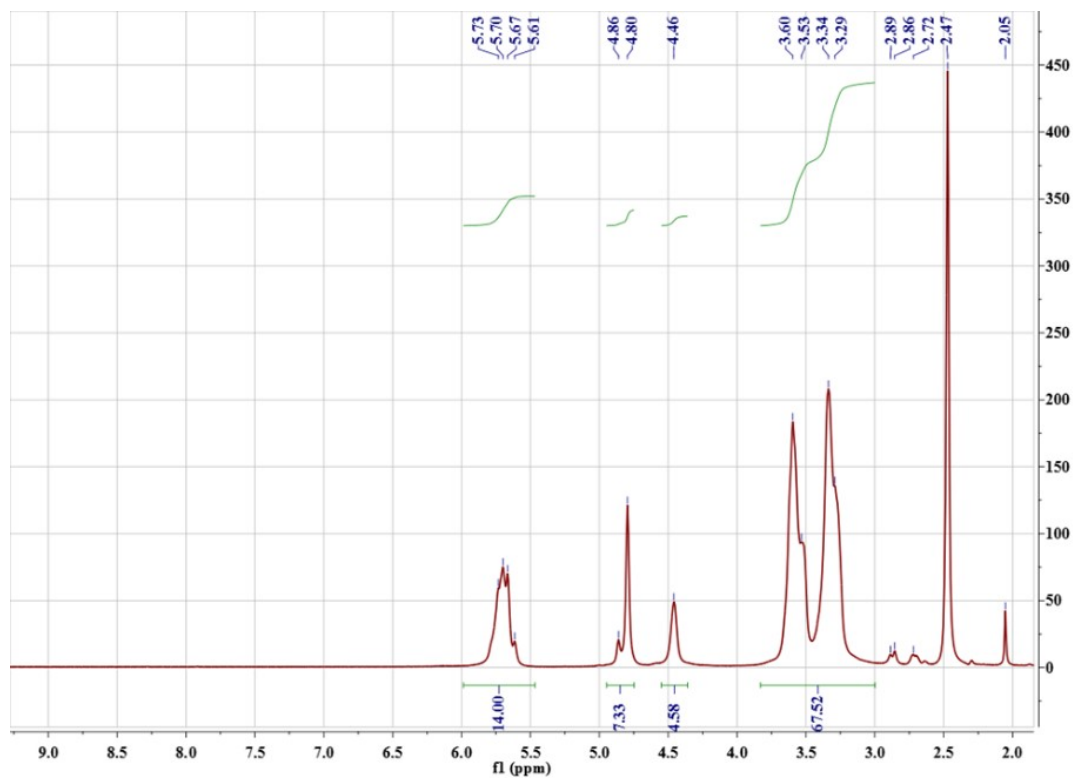

Figure S3 <sup>1</sup>H NMR of mono-(6-amino-6-deoxy)-β-cyclodextrin

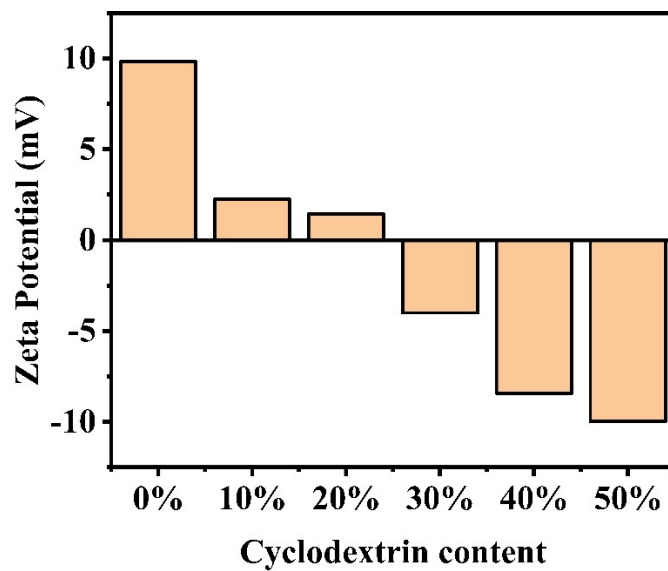

Figure S4 zeta potential of β-CD-TT-COF aerogels with different cyclodextrin contents;

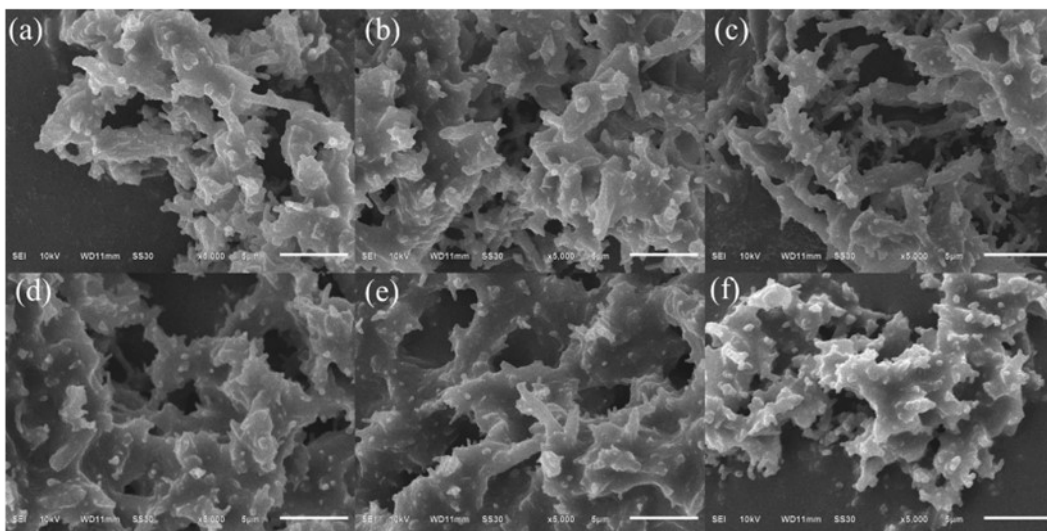

**Figure S5 SEM images of  $\beta$ -CD-TT-COF aerogels with different cyclodextrin contents (a) 0%, (b) 10%, (c) 20%, (d) 30%, (e) 40%, (f) 50%**

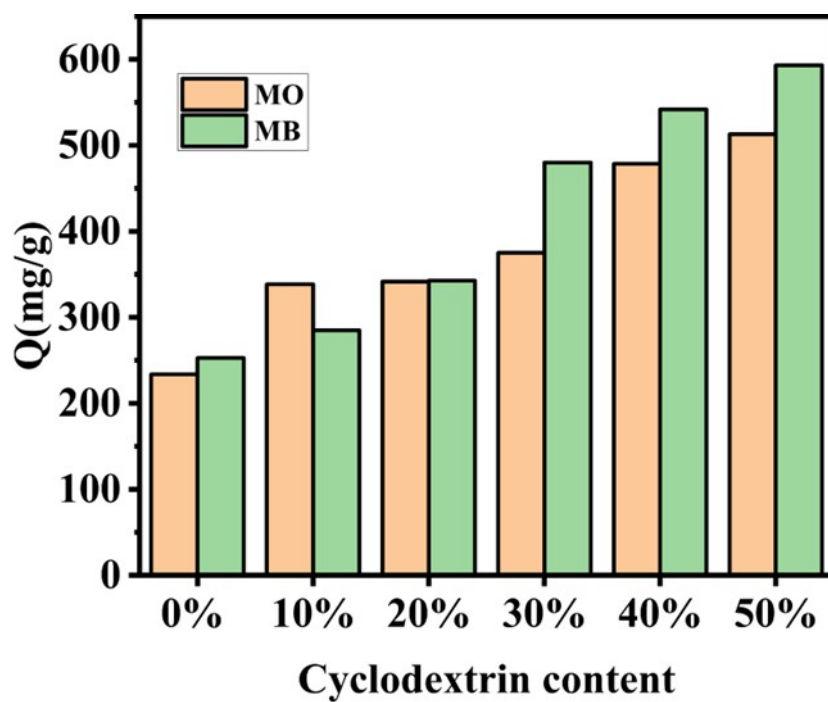

**Figure S6 Adsorption capacity (d) of COF aerogels with different 6-NH<sub>2</sub>- $\beta$ -CD contents**

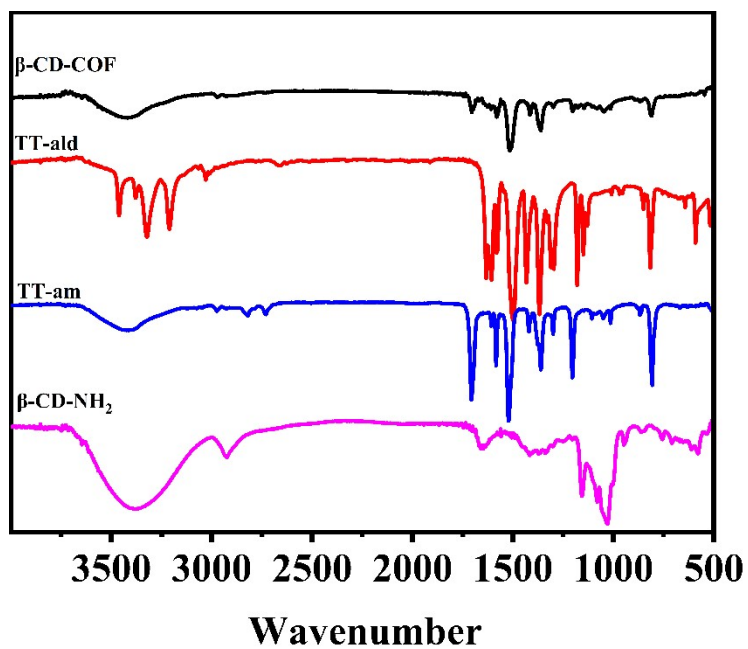

Figure S7 FTIR spectra of  $\beta$ -CD-TT-COF aerogel, aldehyde monomer (TT-ald), amine monomer (TTam) and 6-NH<sub>2</sub>- $\beta$ -cyclodextrin;

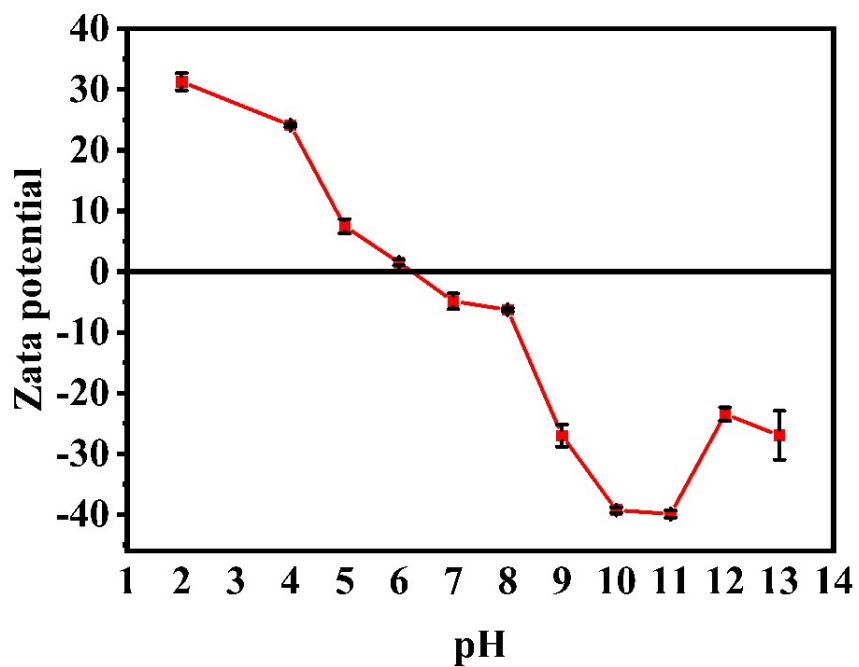

Figure S8 zeta potential of  $\beta$ -CD-TT-COF aerogels with different pH

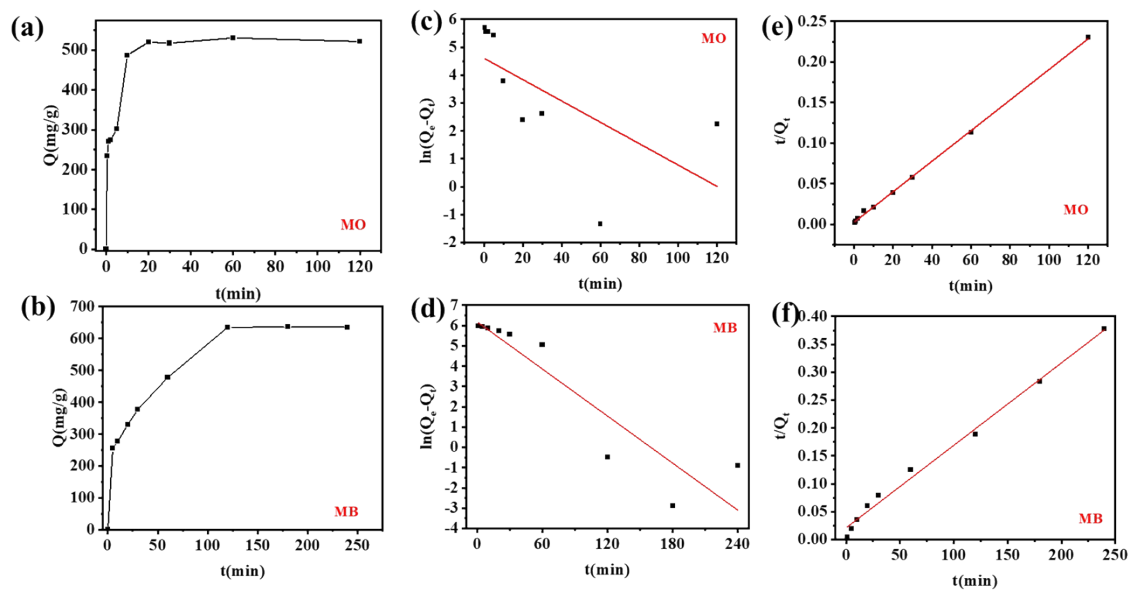

**Figure S9** The adsorption kinetic curves (a, b) and pseudo-first-order model (c, d) and pseudo-second-order model (e, f) of  $\beta$ -CD-TT-COF aerogels for methyl orange and methylene blue (dye concentration: 200 mg/L; sorbent mass: 20 mg, volume: 60 mL, temperature: 310 K)

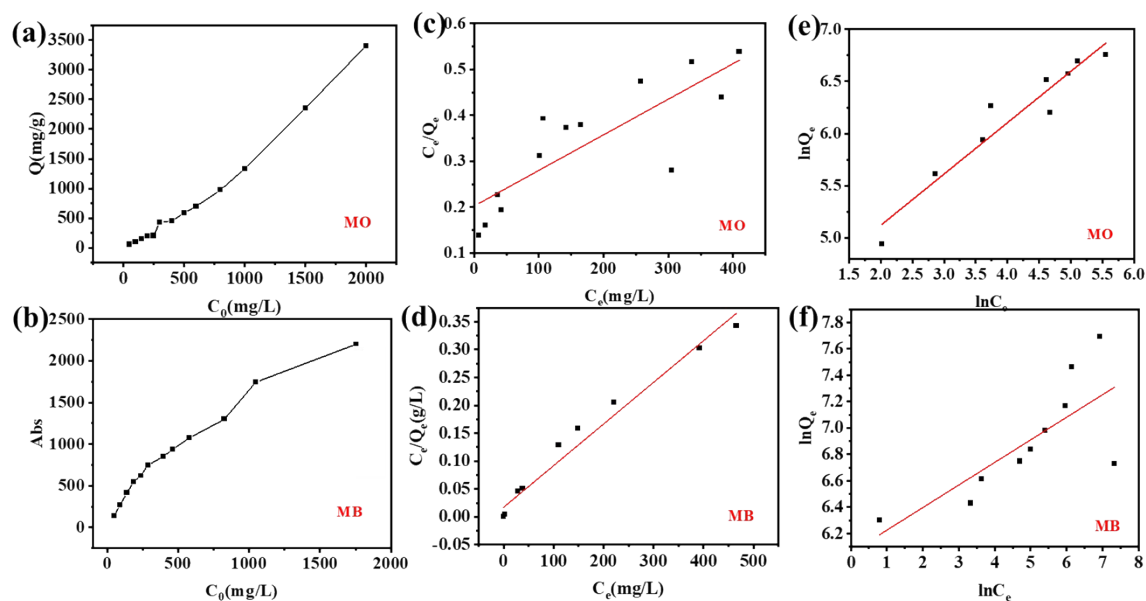

**Figure S10** Adsorption isotherms (a, b) and fitting curves of Langmuir model (c, d) and Freundlich model (f, f) of  $\beta$ -CD-TT-COF aerogel for methyl orange and methylene blue (dye concentration: 20-2000 mg/L; adsorption Dosage mass: 2 mg, volume: 6 mL, temperature: 310 K)

### III. Supporting tables

**Table S1 Molecular sizes and properties of different dyes**

| Dye molecule       | M <sub>w</sub> (g/mol) | λ <sub>max</sub> (nm) | Charge  | Molecule size(Å)  |
|--------------------|------------------------|-----------------------|---------|-------------------|
| Methyl Orange (MO) | 327.3                  | 462                   | -       | 8.54 × 15.8 × 3.7 |
| Congo Red(CR)      | 698.7                  | 497                   | -       | 26.4 × 7.5 × 6.8  |
| Nile Red (NR)      | 318.4                  | 553                   | neutral | 14.2 × 6.5 × 3.1  |
| Calcein (CA)       | 622.5                  | 369                   | neutral | 12.2 × 7.5 × 7.7  |
| Methylene Blue(MB) | 319.9                  | 553                   | +       | 13.4 × 5.0 × 4.2  |
| Rhodamine B(RhB)   | 479.0                  | 664                   | +       | 15.9 × 12.0 × 5.6 |

**Table S2 Synthesis ratio of β-CD-COF aerogels with different defect contents**

|   | TT-ald(mg)          | TT-am(mg)            | β-CD-NH <sub>2</sub> (mg) | β-CD-NH <sub>2</sub> contains NH <sub>2</sub> for all NH <sub>2</sub> content | Yield(mg) |
|---|---------------------|----------------------|---------------------------|-------------------------------------------------------------------------------|-----------|
| ① | 23.6<br>(0.06 mmol) | 21.3<br>(0.06 mmol)  | 0                         | 0                                                                             | 45        |
| ② | 23.6<br>(0.06 mmol) | 19.3<br>(0.054 mmol) | 6.8<br>(0.006 mmol)       | 10 %                                                                          | 42.6      |
| ③ | 23.6<br>(0.06 mmol) | 17.0<br>(0.048 mmol) | 13.6<br>(0.012 mmol)      | 20 %                                                                          | 35.4      |
| ④ | 23.6<br>(0.06 mmol) | 14.9<br>(0.42 mmol)  | 20.41<br>(0.018 mmol)     | 30 %                                                                          | 33.7      |
| ⑤ | 23.6<br>(0.06 mmol) | 12.8<br>(0.036 mmol) | 27.21<br>(0.024 mmol)     | 40 %                                                                          | 28.5      |
| ⑥ | 23.6<br>(0.06 mmol) | 10.6<br>(0.03 mmol)  | 34.02<br>(0.03 mmol)      | 50 %                                                                          | 24.6      |
| ⑦ | 23.6<br>(0.06 mmol) | 8.43<br>(0.03 mmol)  | 40.82<br>(0.03 mmol)      | 60 %                                                                          | 15.8      |



**Table S3 The comparison of adsorption performance of  $\beta$ -CD-COF aerogel and other adsorbents for MO and MB.**

| Adsorbent                | Dye | Adsorption capacity/(mg · g <sup>-1</sup> ) | Reference |
|--------------------------|-----|---------------------------------------------|-----------|
| Benzodiimidazole-COF     | MO  | 256.0                                       | [3]       |
| Benzodiimidazole-COF     | MB  | 185.0                                       | [3]       |
| MOF-235                  | MO  | 477                                         | [4]       |
| MOF-235                  | MB  | 187                                         | [4]       |
| TS-COF-1                 | MB  | 1691                                        | [5]       |
| TPT-DMBD-COF             | MB  | 45.45                                       | [6]       |
| ICOFs                    | MO  | 290.0                                       | [7]       |
| GA10 aerogel             | MO  | 16                                          | [8]       |
| GO-CS aerogels           | MO  | 543.4                                       | [9]       |
| GO-CS aerogels           | MB  | 110.9                                       | [9]       |
| Graphene aerogel         | MO  | 419                                         | [10]      |
| 3D rGO/ZIF-67 aerogel    | MO  | 350                                         | [11]      |
| $\beta$ -CD-COF aerogels | MO  | 3403.91                                     | This work |
| $\beta$ -CD-COF aerogels | MB  | 2199.37                                     | This work |

## References

- [1] A.H. Temimi, T.J. Boltje, D. Zollinger, F.P. Rutjes and M.C. Feiters, *Bioconjugate Chem.* 2017, **28**, 2160-2166.
- [2] K. Guo, D. Zhang, X. Zhang, J. Zhang, L. Ding, B. Li and S. Zhang, *Angew. Chem. Int. Ed.* 2015, **54**, 12127-12133.
- [3] S. Xu, Z. Yao and Y. Zhang, *Eur. Polym. J.*, 2020, **133**, 109764.
- [4] J. Hu, K. Wu, S. Dong and M. Zheng, *Polyhedron*, 2018, **153**, 261.
- [5] X. Zhu, S. An, Y. Liu, J. Hu, H. Liu, C. Tian, S. Dai, X. Yang, H. Wang, C.W. Abney and S. Dai, *AIChE J.*, 2017, **63**, 3470-3478.
- [6] J. Huo, B. Luo and Ying Chen, *ACS Omega*, 2019, **4**, 22504–22513.
- [7] C. Du, X. Chen, H. Wu, Z. Pan, C. Chen, G. Zhong and C. Cai, *RSC Adv.*, 2023, **13**, 24064-24070
- [8] S. Tang, D.S. Xia, Y. Yao, T.Y. Chen, J. Sun, Y.J. Yin, W. Shen and Y.X. Peng, *J. Colloid Interface Sci.*, 2019, **554** 682-691.
- [9] Y. Shi, G. Song, A. Li, J. Wang, H. Wang, Y. Sun and G. Ding, *Colloids Surf. A Physicochem. Eng. Aspects*, 2022, **641**, 128595.
- [10] Z. He, M. Qin, C. Han, X. Bai, Y. Wu, D. Yao and Y. Zheng, *Colloids Surf. A Physicochem. Eng. Aspects*, 2022, **652**, 129837.
- [11] Q. Yang, R. Lu, S. Ren, C. Chen, Z. Chen and X. Yang, *Chem. Eng. J.*, 2018, **348**, 202-211
